# Supplementary material for: Iron-Oxide Minerals Affect Extracellular Electron-Transfer Paths of Geobacter spp
Source: PubMed Central journal article supplement (PMC4070692; doi:10.1264/jsme2.me12161), 2013-01-30
Supplement: 28_141_s1.pdf [file 28_141_s1.pdf]

**Table S1.** qRT-PCR primers used in this study.

| Primer name | Target gene | Sequence (5' to 3')             | Reference           |
|-------------|-------------|---------------------------------|---------------------|
| Geo494F     | 16S rRNA    | AGG AAG CAC CGG CTA ACT CC      | Holmes et al., 2002 |
| Geo825R     | 16S rRNA    | TAC CCG CRA CAC CTA GT          | Holmes et al., 2002 |
| omcS-1150F  | omcS        | GGC AAC TCG ATC TAT GGT A       | This study          |
| omcS-1242R  | omcS        | GGT AAG GAG CAA ACT TGT CA      | This study          |
| omcZ-1049F  | omcZ        | AAA GCG AGA TCA AGG TGT CC      | This study          |
| omcZ-1193R  | omcZ        | GCC GGT AAT GGT AAG GGT CT      | This study          |
| pilA-51F    | pilA        | GAC ACT TAT GCT TCA GAA ACT CAG | This study          |
| pilA-166R   | pilA        | TTG TAC GCC TTG ACA CGA TA      | This study          |

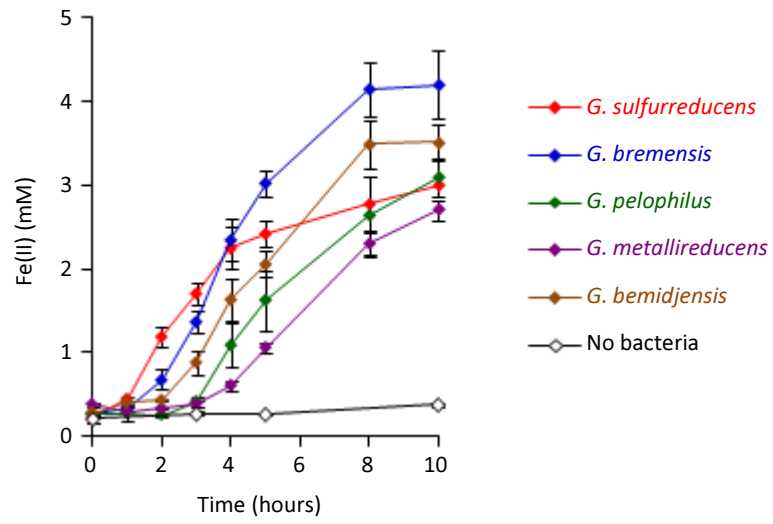

Fig. S1. Ferrihydrite reduction by *Geobacter* species

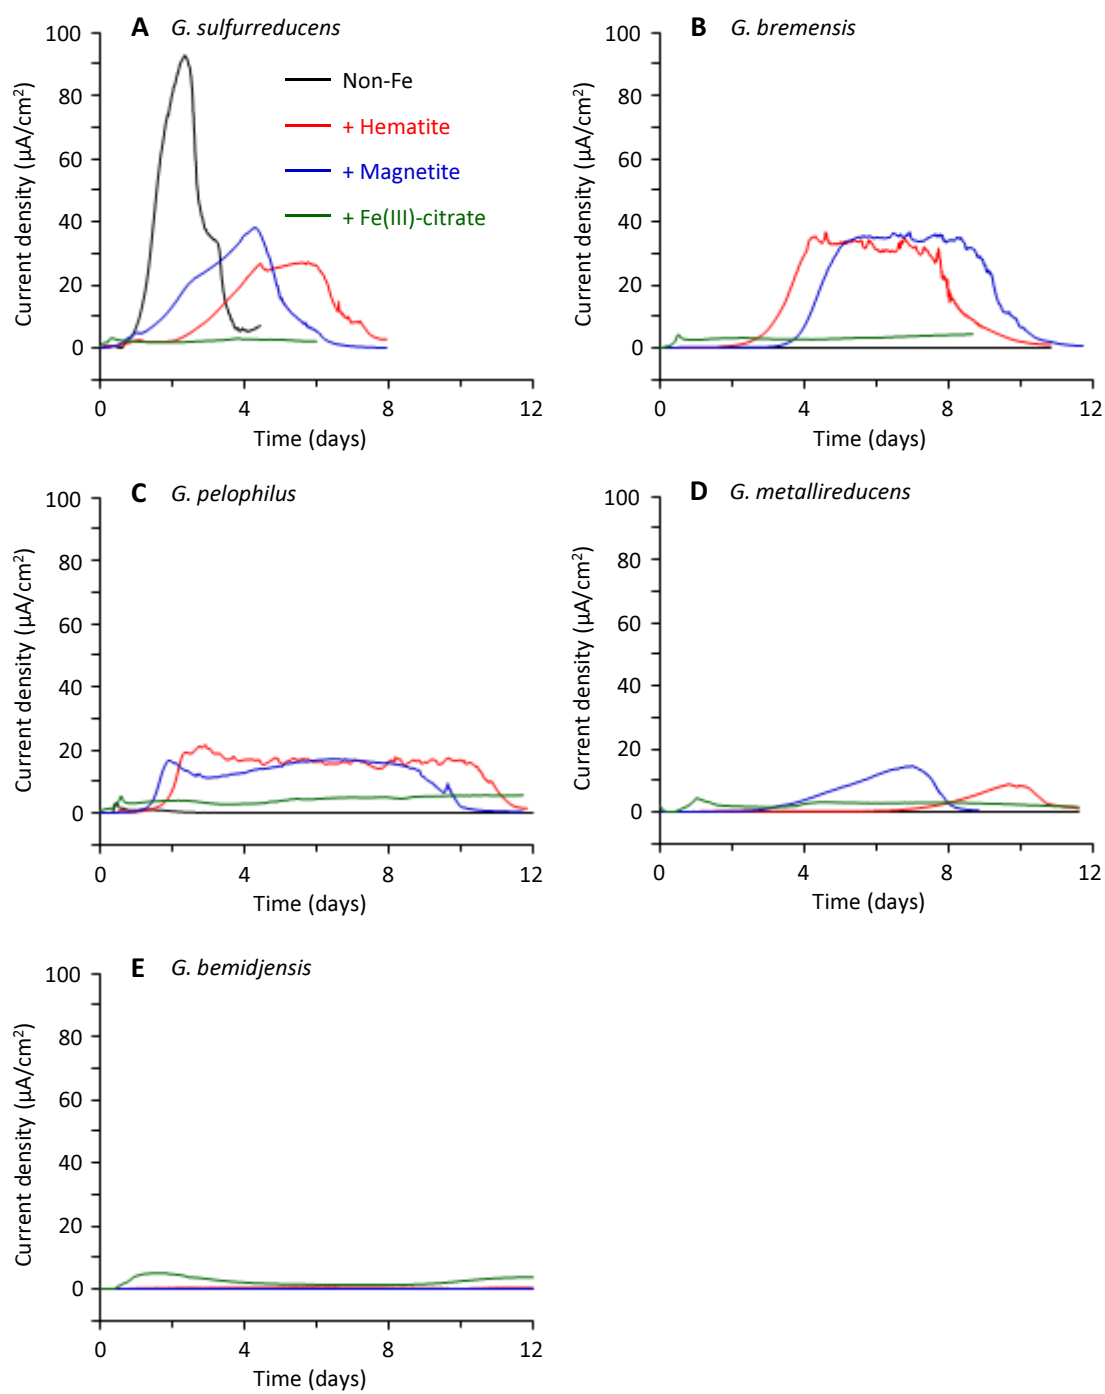

Fig. S2. IT curves for the five *Geobacter* strains in the absence and presence of iron species.

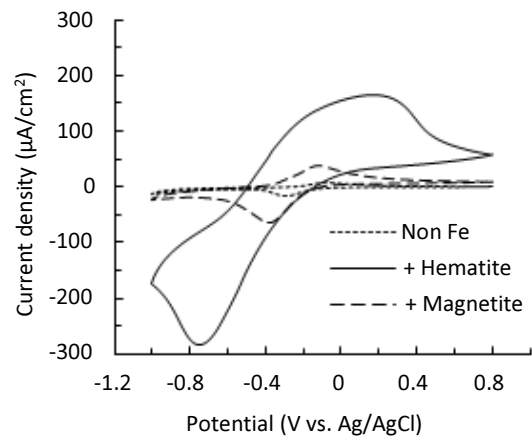

Fig. S3. CV patterns of *G. brevensis*.

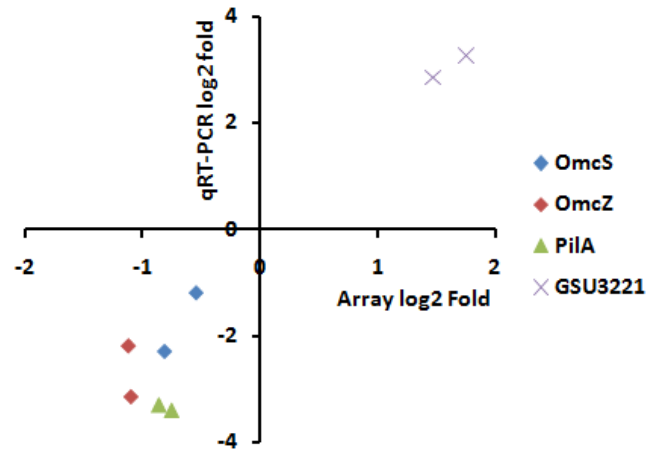

Fig. S4. Comparison in expression-fold data between microarray and qRT-PCR
